# Supplementary material for: High intratumoral dihydrotestosterone is associated with antiandrogen resistance in VCaP prostate cancer xenografts in castrated mice
Source: PubMed Central journal article supplement — iScience. 2022 Apr 25;25(5):104287. doi: 10.1016/j.isci.2022.104287 (PMC9097697; doi:10.1016/j.isci.2022.104287), 2022-04-25
Supplement: mmc2.pdf [file mmc2.pdf]

**Table S2. Enrichment analysis for the differentially expressed filtered gene lists of genes within a certain Gene Ontology term, Related to Figure 5A**

| GO.ID      | Term                                                    | Annotated | Significant | Expected | P.Value  |
|------------|---------------------------------------------------------|-----------|-------------|----------|----------|
| GO:0010469 | regulation of receptor activity                         | 202       | 15          | 1.44     | 9.20E-12 |
| GO:0006954 | inflammatory response                                   | 290       | 17          | 2.07     | 1.40E-11 |
| GO:0032101 | regulation of response to external stimulus             | 339       | 18          | 2.42     | 1.70E-11 |
| GO:0097529 | myeloid leukocyte migration                             | 70        | 10          | 0.5      | 5.30E-11 |
| GO:0051240 | positive regulation of multicellular organismal process | 850       | 26          | 6.07     | 6.70E-11 |
| GO:0045765 | regulation of angiogenesis                              | 131       | 12          | 0.93     | 1.20E-10 |
| GO:0030334 | regulation of cell migration                            | 439       | 19          | 3.13     | 1.50E-10 |
| GO:0048514 | blood vessel morphogenesis                              | 292       | 16          | 2.08     | 1.70E-10 |
| GO:0007155 | cell adhesion                                           | 748       | 24          | 5.34     | 1.70E-10 |
| GO:0001525 | angiogenesis                                            | 248       | 15          | 1.77     | 1.70E-10 |
| GO:0022610 | biological adhesion                                     | 752       | 24          | 5.37     | 1.90E-10 |
| GO:0030595 | leukocyte chemotaxis                                    | 81        | 10          | 0.58     | 2.30E-10 |
| GO:0016477 | cell migration                                          | 763       | 24          | 5.45     | 2.60E-10 |
| GO:0040012 | regulation of locomotion                                | 514       | 20          | 3.67     | 2.90E-10 |
| GO:0050920 | regulation of chemotaxis                                | 83        | 10          | 0.59     | 3.00E-10 |
| GO:0001568 | blood vessel development                                | 352       | 17          | 2.51     | 3.00E-10 |
| GO:0050921 | positive regulation of chemotaxis                       | 60        | 9           | 0.43     | 3.30E-10 |
| GO:1901342 | regulation of vasculature development                   | 144       | 12          | 1.03     | 3.50E-10 |
| GO:0050900 | leukocyte migration                                     | 181       | 13          | 1.29     | 3.90E-10 |
| GO:0032501 | multicellular organismal process                        | 3942      | 55          | 28.13    | 4.60E-10 |

**Table S3. The number of PubMed citations for specific keywords, Related to Figure 5A**

| ID                           | Mean   | Mean    | FC   | FDR   | Number of PubMed citations (Gene + PCa) | Gene +EMT / +PCa | Gene +NE / +PCa | Gene +Migration / +PCa | Gene +Invasion / +PCa | Gene +Inflam- mation / +PCa | Gene +Glyco- lysis / +PCa | Gene +Lipid / + PCa | Gene +Choles- terol / +PCa | Gene +Steroid / +PCa | Gene +Andro- gen / +Pca | Gene +Angio- genesis / +PCa | Gene +Proli- feration / +PCa | Gene +Apopto- sis / +PCa |         |
|------------------------------|--------|---------|------|-------|-----------------------------------------|------------------|-----------------|------------------------|-----------------------|-----------------------------|---------------------------|---------------------|----------------------------|----------------------|-------------------------|-----------------------------|------------------------------|--------------------------|---------|
|                              | Enza I | Enza II |      |       |                                         |                  |                 |                        |                       |                             |                           |                     |                            |                      |                         |                             |                              |                          |         |
| <b>TOP 10 up regulated</b>   |        |         |      |       |                                         |                  |                 |                        |                       |                             |                           |                     |                            |                      |                         |                             |                              |                          |         |
| ICAM1                        | 2.6    | 29.4    | 8.5  | 0.000 | 57                                      | 2133             | 43/0            | 12/0                   | 2033/8                | 472/9                       | 6769/14                   | 14/0                | 876/1                      | 604/0                | 118/0                   | 23/8                        | 485/7                        | 1735/14                  | 1377/12 |
| THBS1                        | 32.5   | 163.4   | 4.9  | 0.000 | 10                                      | 271              | 11/0            | 3/1                    | 67/0                  | 44/0                        | 73 /0                     | 3/0                 | 17/0                       | 4/0                  | 5/0                     | 1/1                         | 106/2                        | 119/2                    | 87/0    |
| SCNN1A                       | 3.6    | 24.3    | 5.5  | 0.000 | 0                                       | 22               | 3               | 1                      | 4                     | 4                           | 8                         | 0                   | 5                          | 2                    | 8                       | 0                           | 0                            | 12                       | 4       |
| PLOD2                        | 2.6    | 14.9    | 4.4  | 0.000 | 0                                       | 82               | 8               | 0                      | 35                    | 28                          | 11                        | 0                   | 0                          | 0                    | 0                       | 0                           | 5                            | 30                       | 5       |
| CCL2                         | 12.4   | 71.9    | 5.4  | 0.000 | 136                                     | 2206             | 97/10           | 17/0                   | 2165/43               | 463/39                      | 7893/33                   | 27/0                | 845/0                      | 614/0                | 87/1                    | 46/23                       | 758/16                       | 1642/46                  | 1183/25 |
| HSPA6                        | 5.3    | 25.8    | 4.3  | 0.000 | 1                                       | 52               | 1/0             | 0                      | 17/0                  | 8/0                         | 12/0                      | 2/0                 | 5/0                        | 0                    | 2/0                     | 1/1                         | 1/0                          | 18/0                     | 25/1    |
| KLK3                         | 58.1   | 195.0   | 3.3  | 0.000 | 223                                     | 257              | 3/3             | 4/3                    | 12/11                 | 18/15                       | 11/5                      | 1/1                 | 2/2                        | 3/1                  | 16/14                   | 99/86                       | 21/17                        | 38/31                    | 12/8    |
| AKAP12                       | 14.4   | 48.8    | 3.2  | 0.000 | 15                                      | 113              | 3/0             | 2/0                    | 32/3                  | 23/6                        | 25/0                      | 0                   | 5/1                        | 2/0                  | 1/0                     | 2/2                         | 18/2                         | 51/6                     | 28/2    |
| TMEFF2                       | 20.9   | 72.3    | 3.3  | 0.000 | 26                                      | 107              | 2/0             | 1/1                    | 9/2                   | 10/3                        | 3/0                       | 0                   | 0                          | 0                    | 1/0                     | 7/7                         | 0                            | 24/6                     | 11/3    |
| OR51E2                       | 2.3    | 11.5    | 3.7  | 0.000 | 26                                      | 32               | 1/1             | 1/1                    | 4/3                   | 4/4                         | 4/1                       | 0                   | 0                          | 0                    | 0                       | 5/5                         | 0                            | 10/7                     | 0       |
| <b>TOP 10 down regulated</b> |        |         |      |       |                                         |                  |                 |                        |                       |                             |                           |                     |                            |                      |                         |                             |                              |                          |         |
| NOV/CCN3                     | 25.9   | 8.10    | -3.0 | 0.000 | 12                                      | 88               | 6/1             | 0                      | 70/2                  | 26/0                        | 45/0                      | 3/0                 | 7/0                        | 3/0                  | 4/0                     | 5/5                         | 49/1                         | 108/3                    | 29/0    |
| NTM/<br>neurotrimin          | 8.5    | 3.17    | -2.3 | 0.000 | 0                                       | 4                | 1               | 0                      | 4                     | 0                           | 0                         | 0                   | 1                          | 1                    | 1                       | 0                           | 0                            | 5                        | 3       |
| DSC3                         | 58.3   | 27.99   | -2.0 | 0.000 | 1                                       | 50               | 3/1             | 1/0                    | 9/1                   | 5/1                         | 1/0                       | 0                   | 2/0                        | 2/0                  | 1/0                     | 1/0                         | 0                            | 14/1                     | 4/1     |
| EPHB4                        | 51.8   | 26.33   | -1.9 | 0.000 | 14                                      | 249              | 4/0             | 0                      | 113/8                 | 59/8                        | 28/0                      | 1/0                 | 6/1                        | 0                    | 2/0                     | 1/1                         | 183/3                        | 145/4                    | 72/3    |
| MCC gene                     | 43.6   | 21.96   | -1.9 | 0.000 | 1                                       | 33               | 0               | 0                      | 2/0                   | 0                           | 2/0                       | 0                   | 1/0                        | 1/0                  | 0                       | 0                           | 0                            | 4/0                      | 3/0     |
| LINC00940                    | 6.9    | 3.21    | -1.9 | 0.000 | 0                                       | 1                | 0               | 0                      | 0                     | 0                           | 0                         | 0                   | 0                          | 0                    | 0                       | 0                           | 0                            | 0                        | 0       |
| DPP4                         | 8.3    | 2.50    | -2.7 | 0.020 | 15                                      | 356              | 22/0            | 9/0                    | 85/2                  | 41/2                        | 445/0                     | 2/0                 | 263/0                      | 176/0                | 16/0                    | 12/3                        | 57/0                         | 229/3                    | 196/1   |
| TRPM8                        | 148.6  | 84.41   | -1.8 | 0.000 | 80                                      | 198              | 3/0             | 6/1                    | 41/17                 | 20/5                        | 140/1                     | 0                   | 47/4                       | 9/0                  | 11/5                    | 29/23                       | 7/1                          | 73/26                    | 48/21   |
| GLI3                         | 3.1    | 1.36    | -1.7 | 0.000 | 12                                      | 192              | 11/0            | 3/0                    | 42/1                  | 23/0                        | 9/0                       | 2/0                 | 9/0                        | 6/0                  | 7/1                     | 7/3                         | 11/0                         | 177/5                    | 70/0    |
| PLEKHN1                      | 7.8    | 3.99    | -1.8 | 0.000 | 0                                       | 3                | 0               | 0                      | 0                     | 0                           | 0                         | 0                   | 4                          | 0                    | 0                       | 0                           | 0                            | 0                        | 2       |

**Table S4. Real-Time Quantitative RT–PCR Primer Sequences, Related to STAR Methods**

| RT-qPCR primer sequence |                                  |                             |
|-------------------------|----------------------------------|-----------------------------|
| Human gene              | Forward                          | Reverse                     |
| <i>AR-FL</i>            | CTTACACGTGGACGACCAGA             | GCTGTACATCCGGGACTTGT        |
| <i>AR-V1</i>            | CCATCTTGTCGTCTTCGGAAATGTTATGAAGC | CTGTTGTGGATGAGCAGCTGAGAGTCT |
| <i>AR-V7</i>            | CCATCTTGTCGTCTTCGGAAATGTTATGAAGC | TTTGAATGAGGCAAGTCAGCCTTTCT  |
| <i>L19</i>              | AGGCACATGGGCATAGGTAA             | CCATGAGAATCCGCTTGTTT        |
| Mouse gene              | Forward                          | Reverse                     |
| <i>Cyp11a1</i>          | AGATCCCTTCCCCTGGCGACAATG         | CGCATGAGAAGAGTATCGACGCATC   |
| <i>Cyp17a1</i>          | CAAGCCAAGATGAATGCAGA             | AGGATTGTGCACCAGGAAAG        |
| <i>Hsd3b1</i>           | CAGGAGCAGGAGGGTTTGTG             | GTGGCCATTCAGGACGAT          |
| <i>Hsd3b2</i>           | CAGTTGTTGGTGCAAGAGGA             | CCTGGGAATGACACCTGTGA        |
| <i>Hsd17b3</i>          | GTCGGACACTGGAAAAGCTAC            | CGGAAGTGCTCAGGAAATGG        |
| <i>Hsd17b6</i>          | TTTGGAGGATTCTACAGTTGCTC          | TCACCCCGAAATCTTGAACCT       |
| <i>L19</i>              | GGACAGAGTCTTGATGATCTC            | CTGAAGGTCAAAGGGAATGTG       |
| <i>Srd5a1</i>           | CCCTGCTGTTACCTTTGTC              | ATCACCATGCCACTAACCA         |
| <i>Srd5a2</i>           | TTACCTGGTTTATTGCGCGG             | TGGCTCCAGACACATACGTA        |

**Full names of human genes:** androgen receptor, androgen receptor splice variant-1, androgen receptor splice variant-7, ribosomal protein L19

**Full names of mouse genes:** cytochrome P450, family 11, subfamily a, polypeptide 1; cytochrome P450, family 17, subfamily a, polypeptide 1; hydroxy-delta-5-steroid dehydrogenase, 3 beta- and steroid delta-isomerase 1, hydroxy-delta-5-steroid dehydrogenase, 3 beta- and steroid delta-isomerase 2, hydroxysteroid (17-beta) dehydrogenase 3, hydroxysteroid (17-beta) dehydrogenase 6, ribosomal protein L19, steroid 5 alpha-reductase 1, steroid 5 alpha-reductase 2, steroid 5 alpha-reductase 3
